# Supplementary material for: Shotgun proteomics implicates protease inhibition and complement activation in the antiinflammatory properties of HDL
Source: JCI journal article supplement (doi:10.1172/jci26206), 2007-03-01
Supplement: sd1 [file 1]

## SUPPLEMENTAL MATERIAL

### Supplemental Methods

**Multidimensional liquid chromatography-electrospray ionization (ESI) tandem mass spectrometric (MS/MS) analysis.** Peptides from the tryptic digest of HDL samples (10  $\mu$ g protein) were separated using 2-dimensional micro-liquid chromatography (LC) with strong cation exchange and reverse-phase capillary HPLC columns. The LC system was interfaced with a Finnigan LCQ Deca ProteomeX ion trap mass spectrometer (Thermo Electron Corporation) equipped with an orthogonal electrospray interface. A fully automated 10-step chromatography run with a quaternary Surveyor HPLC (Thermo Electron Corporation) was performed on each sample (15), using buffer A (0.1% v/v formic acid in water), buffer B (100% acetonitrile in 0.1% formic acid), buffer C (5% acetonitrile in 0.1% formic acid), and buffer D (ammonium chloride in buffer C). Peptides were eluted from the strong cation exchange column onto the reverse-phase column using increasing concentrations of ammonium chloride in buffer D (20, 30, 40, 50, 60, 70, 80, 120 and 600 mM). Peptides were eluted from the reverse-phase column at a flow rate of 2  $\mu$ L/min using the following program: i) 95% buffer A and 5% buffer B for 5 min, ii) a linear gradient of 5% to 35% buffer B in buffer A for 90 min, iii) 35% buffer B and 65% buffer A for 15 min, iv) 20% buffer A and 80% buffer B for 10 min, v) a linear gradient of 80% to 5% buffer B in buffer A for 20 min, vi) 5% buffer B and 95% buffer A for 20 min. A survey scan from  $m/z$  300 to  $m/z$  1500 was initially performed, followed by data-dependent MS/MS analysis of the 3 most abundant ions.

Tryptic digests of total HDL and apoA-I particles were analyzed by capillary LC (Paradigm MS4B, Michrom Bioresources Inc. Auburn, CA) coupled to a electrospray-

linear ion trap mass spectrometer (LTQ, Thermo Electron Corp., Waltham, MA). Tryptic digest (2  $\mu\text{g}$  HDL protein) was injected onto a trap column (Paradigm Platinum Peptide Nanotrap, Michrom Bioresources Inc.), desalted for 5 min with 5% acetonitrile, 0.1% formic acid (50  $\mu\text{L}/\text{min}$ ), and then eluted onto an analytical reverse-phase column (0.150 x 150 mm, Magic C18AQ, 5  $\mu\text{m}$  beads; Michrom Bioresources Inc.) and separated at a flow rate of 1  $\mu\text{L}/\text{min}$  over 180 min using a linear gradient of 5 to 37% buffer E (5% acetonitrile, 0.1% formic acid) in buffer F (90% acetonitrile, 0.1% formic acid). Tandem mass spectra were acquired using data-dependent acquisition with one MS survey scan followed by MS/MS scans of the 8 most abundant peaks in the survey scan.

**Shotgun proteomics of HDL identifies proteins reproducibly.** Shotgun proteomics must often be repeated many times to correctly identify all the proteins in a complex mixture (1). For studies of material derived from patients, biological variability is an additional problem. Because LC-ESI-MS/MS is a time- and instrument-intensive procedure, we determined the number of analyses needed to reasonably assess protein composition.

Using ultracentrifugation, we isolated HDL from the blood of 2 healthy men and 2 men with established CAD. Each sample was digested with trypsin and then subjected to LC-ESI-MS/MS with data-dependent analysis. Our initial analysis identified ~24 proteins in the HDL from the 2 controls and ~40 proteins in the HDL from the 2 patients (Supplemental material; Fig. 1). Three additional analyses of the same samples increased the total number of proteins identified in each group by ~20%. These observations indicate that a single analysis of HDL gives a reasonable estimate of the number of

proteins that LC-ESI-MS/MS can identify and that the analyses yield reproducible results.

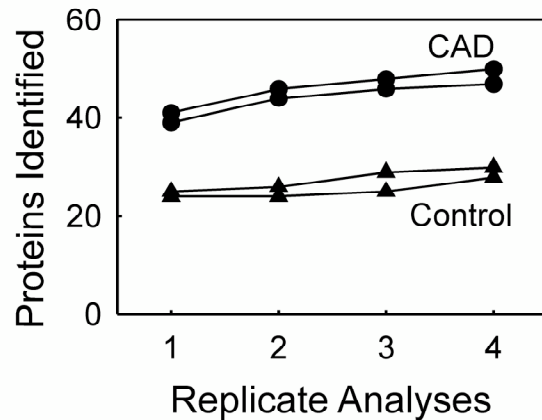

**Supplemental Figure 1. Effect of repeated LC-ESI-MS/MS analysis on the number of proteins identified in plasma HDL.** Total HDL was isolated by density gradient ultracentrifugation from the plasma of 2 control subjects and 2 subjects with established CAD. HDL proteins were precipitated with trichloroacetic acid, digested with trypsin, and desalted. Then each digest was subjected to 4 independent 2-dimensional LC-ESI-MS/MS analyses with an ion trap instrument.

### Reference

1. Washburn, M.P., Ulaszek, R.R., and Yates, J.R., 3rd. 2003. Reproducibility of quantitative proteomic analyses of complex biological mixtures by multidimensional protein identification technology. *Anal Chem* 75:5054-5061.

**Supplemental Table 1. HDL-associated proteins enriched in patients with CAD.**

| <u>Protein</u> | <u>Peptide index</u> | <u>P Value</u> |
|----------------|----------------------|----------------|
| ApoC-IV        | 0.86                 | 0.006          |
| Paraoxonase 1  | 0.73                 | 0.004          |
| C3             | 0.65                 | 0.03           |
| ApoA-IV        | 0.58                 | 0.002          |
| ApoE           | 0.54                 | 0.0003         |

---

Relative protein abundance was assessed initially using a peptide index of > 0.4 followed by statistical analysis. The *P* value was assessed by Student's t-test (peptide number) or Fisher's exact test (subject number).

**Supplemental Table 2. Proteins detected by LC-ESI-MS/MS in HDL isolated from human atherosclerotic tissue and plasma of CAD patients.**

| <u>Protein Description</u> | <u>Unique Peptides</u> |
|----------------------------|------------------------|
| Paraoxonase 1              | 26                     |
| C3                         | 45                     |
| ApoE                       | 118                    |

Human atherosclerotic tissue was obtained at surgery from 6 subjects undergoing carotid endarterectomy. HDL was isolated from tissue by sequential density gradient ultracentrifugation. Proteins associated with 3 different pooled preparations of lesion HDL (prepared from 2 different individuals) were analyzed in duplicate by LC-ESI-MS/MS. Proteins were identified as described in the legend to Table 2 of the paper.
